# Supplementary material for: TNFR2 as a Potential Biomarker for Early Detection and Progression of CKD
Source: MDPI journal article supplement (doi:10.3390/biom13030534), 2023-03-15
Supplement: s1 [file s1]

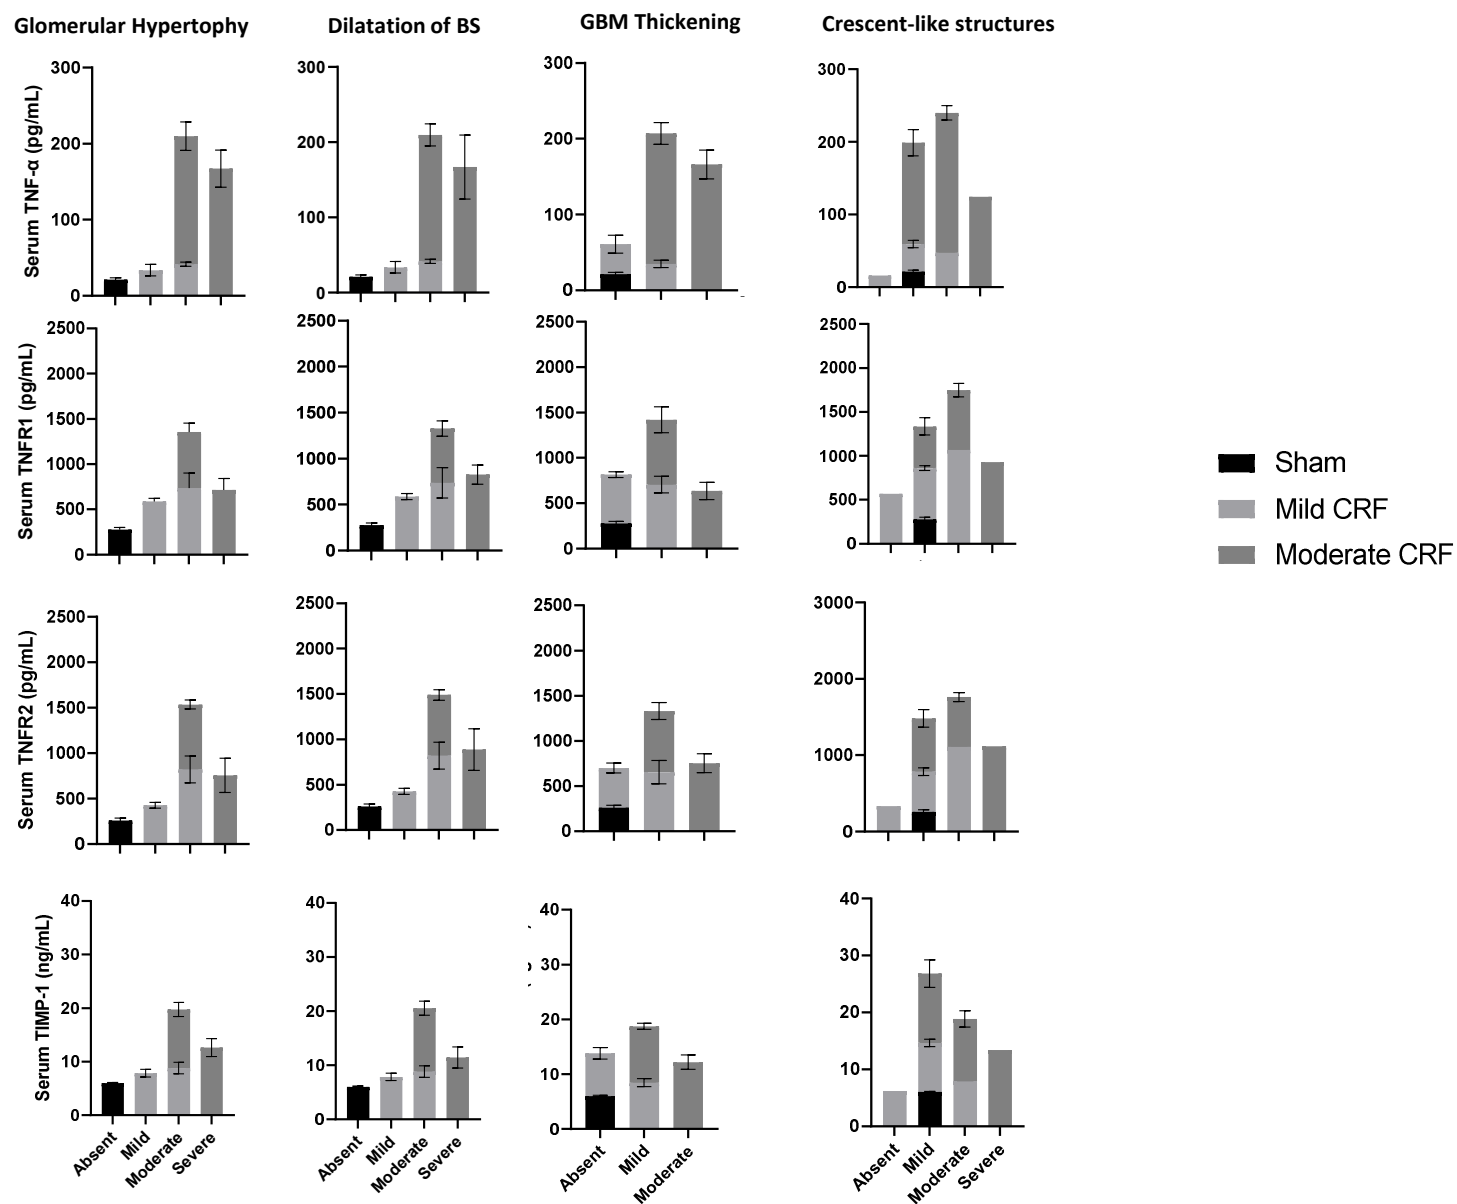

Supplementary Figure S1: Association of mild glomerular lesions with the circulating levels of TNF-α, TNFR1, TNFR2 and TIMP-1

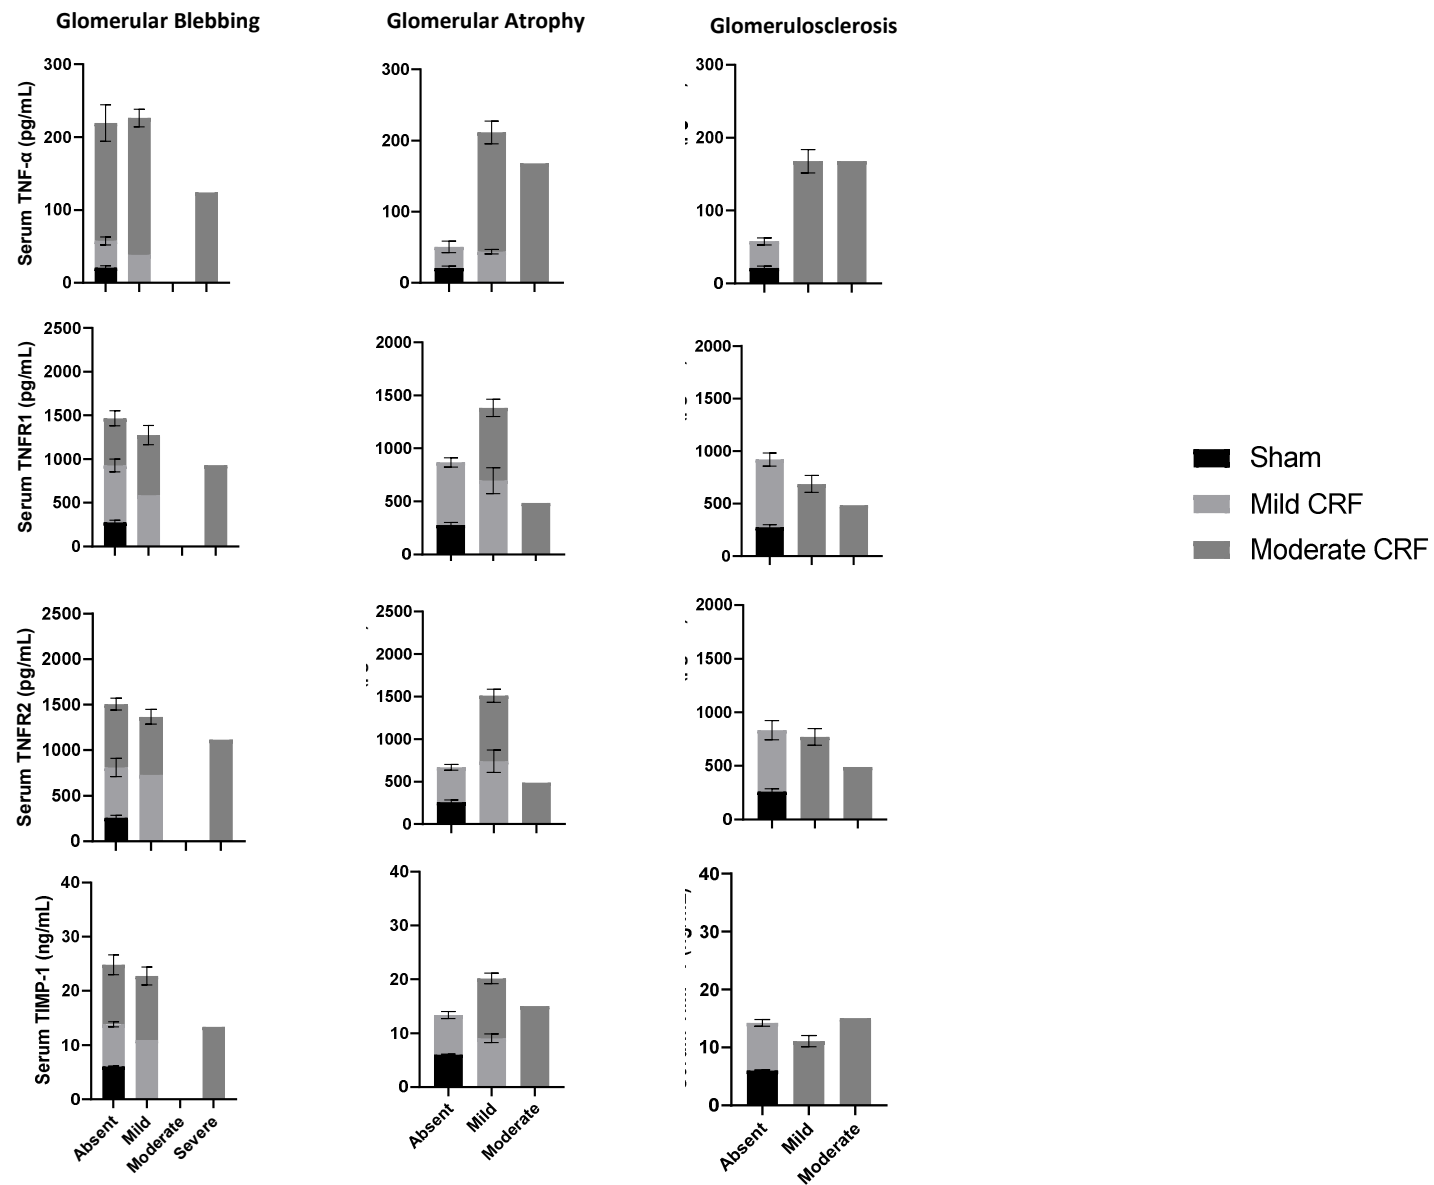

Supplementary Figure S2: Association of advanced glomerular lesions with the circulating levels of TNF-α, TNFR1, TNFR2 and TIMP-1

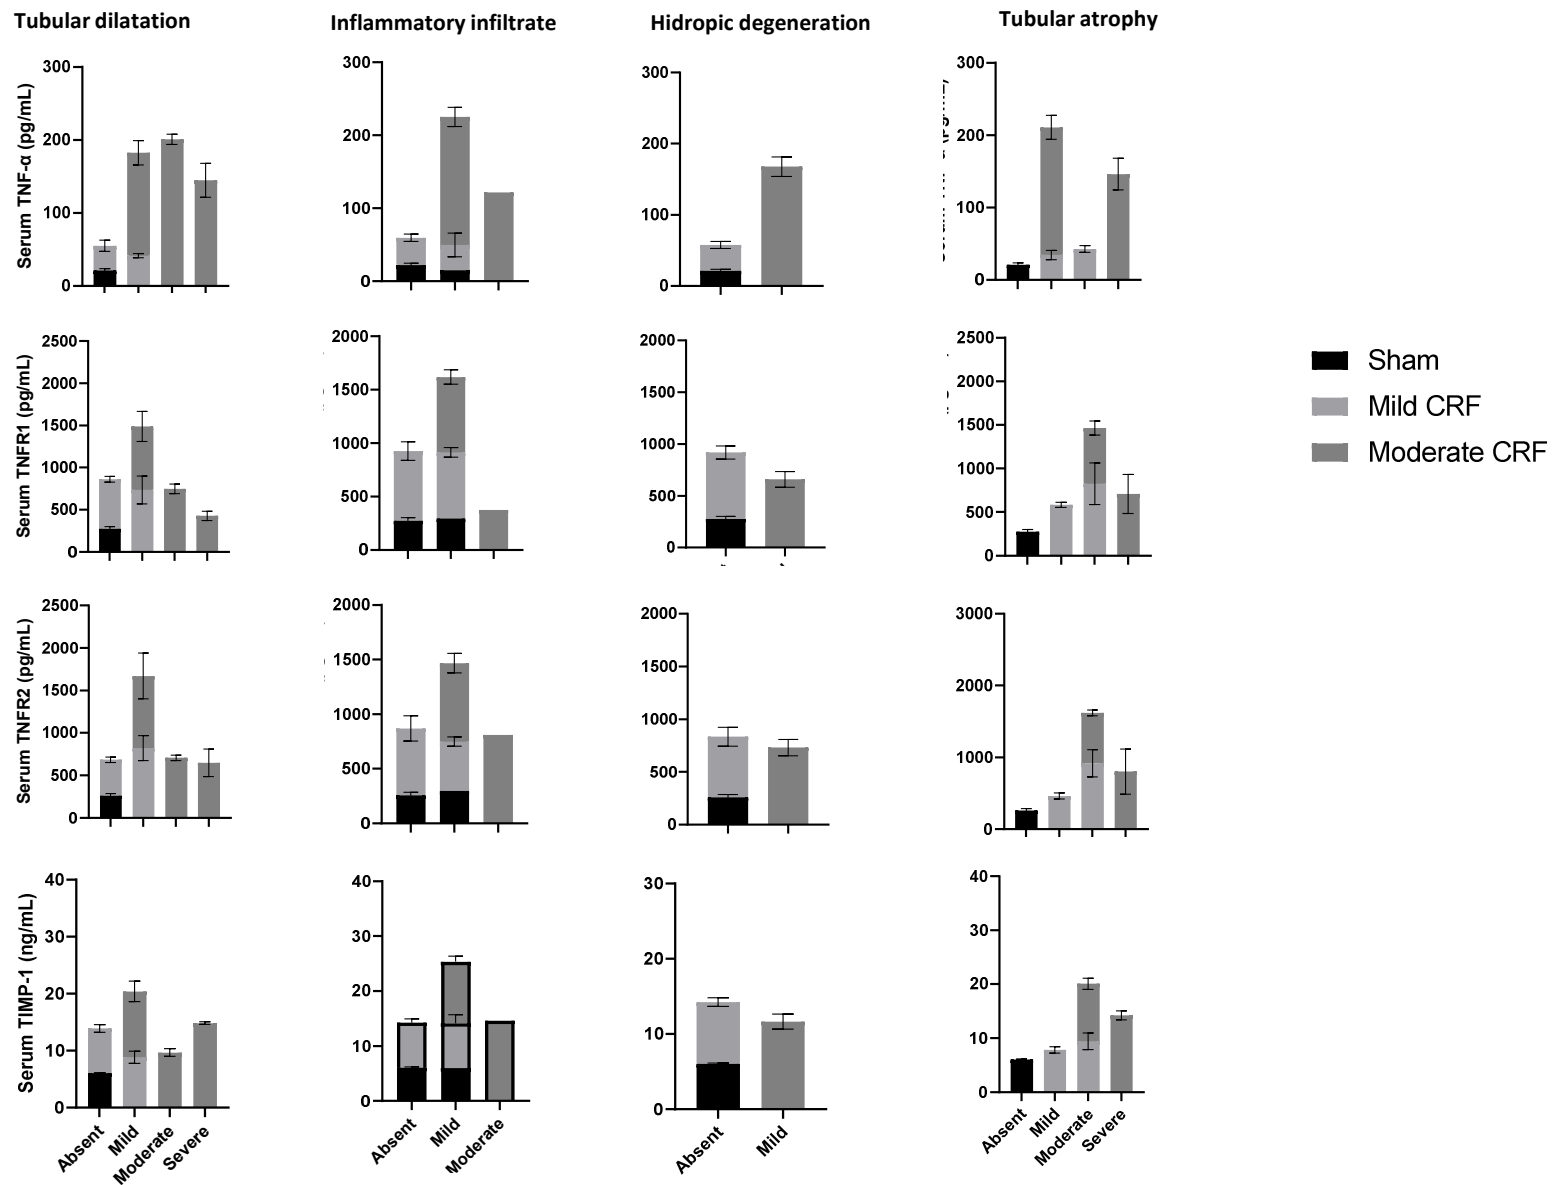

Supplementary Figure S3: Association of mild tubulointerstitial lesions with the circulating levels of TNF-α, TNFR1, TNFR2 and TIMP-1

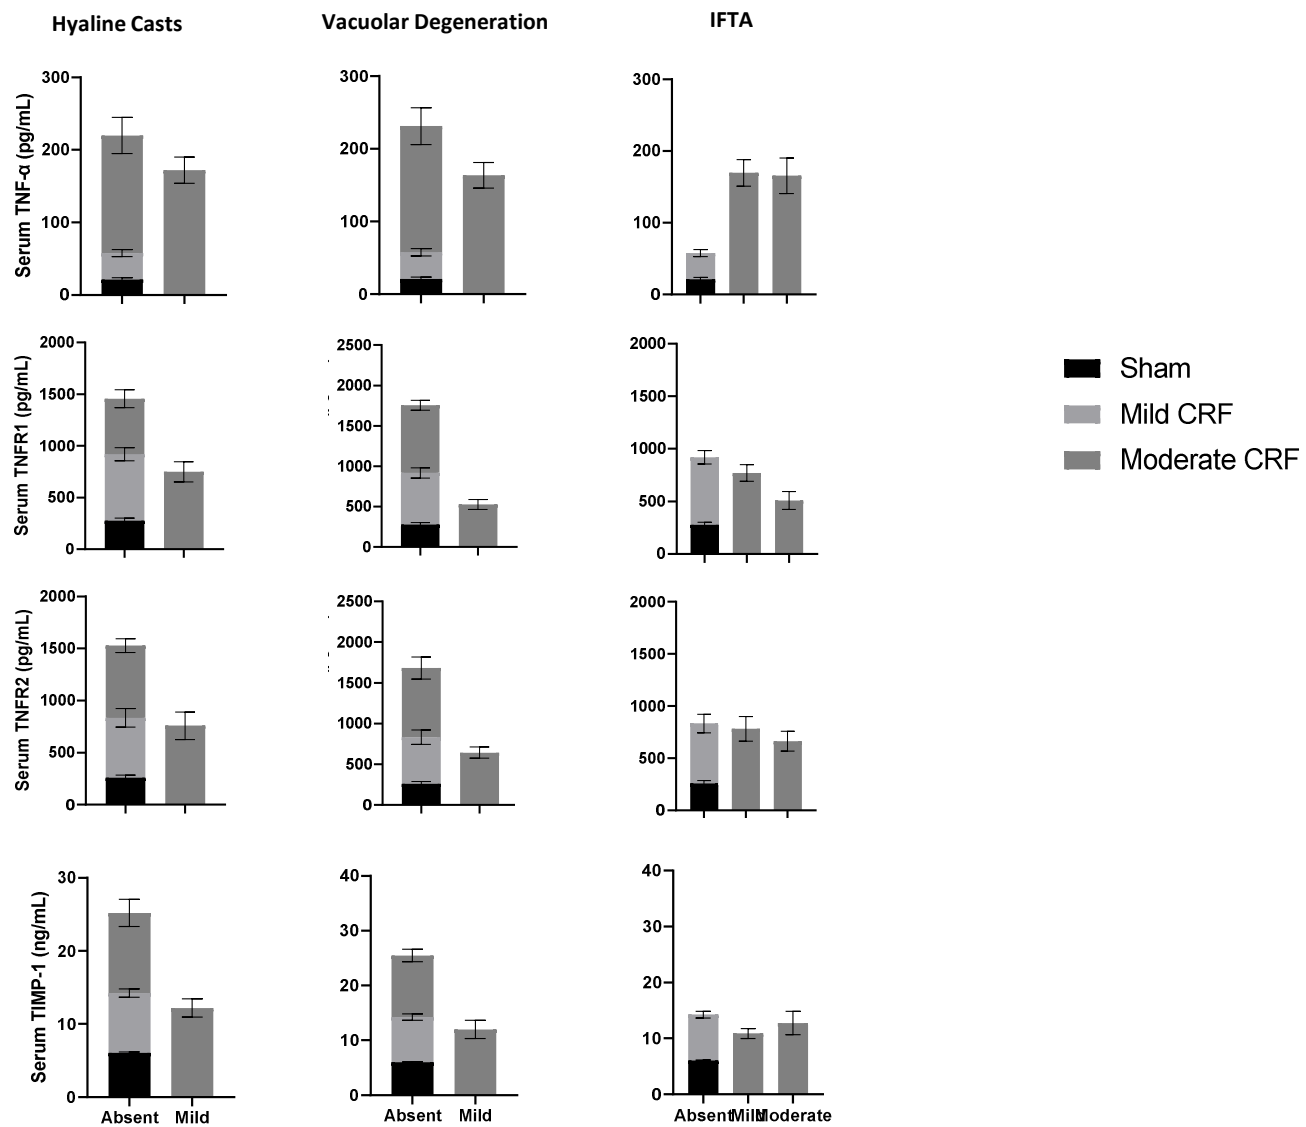

Supplementary Figure S4: Association of advanced tubulointerstitial lesions with the circulating levels of TNF-α, TNFR1, TNFR2 and TIMP-1
