# Supplementary material for: TNFR2 as a Potential Biomarker for Early Detection and Progression of CKD
Source: MDPI journal article supplement (doi:10.3390/biom13030534), 2023-03-15
Supplement: s1 [file s1]

**Supplementary Table S1. Histopathologic features of rat groups under study, at the end of protocol**

|                                            | (Total n= 23) |               | Sham (n = 8) |          | CKD 1-2 (n = 8) |          | CKD 3-4 (n = 7) |          | P       |
|--------------------------------------------|---------------|---------------|--------------|----------|-----------------|----------|-----------------|----------|---------|
|                                            | Absent n (%)  | Present n (%) | Absent       | Present  | Absent          | Present  | Absent          | Present  |         |
|                                            |               |               |              |          |                 |          |                 |          |         |
| <b>Mild Glomerular Lesions</b>             |               |               |              |          |                 |          |                 |          |         |
| Glomerular Hypertrophy                     | 8 (34.8)      | 15 (65.2)     | 8 (100)      | 0        | 0               | 8 (100)  | 0               | 7 (100)  | < 0.001 |
| Crescent-like structures                   | 1 (4.3)       | 22 (95.7)     | 0            | 8 (100)  | 1 (12.5)        | 7 (87.5) | 0               | 7 (100)  | 0.375   |
| Dilatation of Bowman's space               | 8 (34.8)      | 15 (65.2)     | 8 (100)      | 0        | 0               | 8 (100)  | 0               | 7 (100)  | < 0.001 |
| GBM Thickening                             | 11 (47.8)     | 12 (52.2)     | 8 (100)      | 0        | 3 (37.5)        | 5 (62.5) | 0               | 7 (100)  | < 0.001 |
| <b>Advanced Glomerular Lesions</b>         |               |               |              |          |                 |          |                 |          |         |
| Glomerular "Blebbing"                      | 18 (78.3)     | 5 (21.7)      | 8 (100)      | 0        | 7 (87.5)        | 1 (12.5) | 3 (42.9)        | 4 (57.1) | 0.02    |
| Glomerular Atrophy                         | 12 (52.2)     | 11 (47.8)     | 8 (100)      | 0        | 4 (50.0)        | 4 (50.0) | 0               | 7 (100)  | < 0.001 |
| Glomerulosclerosis                         | 16 (69.6)     | 7 (30.4)      | 8 (100)      | 0        | 8 (100)         | 0        | 0               | 7 (100)  | < 0.001 |
| <b>Mild Tubulointerstitial Lesions</b>     |               |               |              |          |                 |          |                 |          |         |
| Tubular dilatation                         | 13 (56.5)     | 10 (43.5)     | 8 (100)      | 0        | 5 (62.5)        | 3 (37.5) | 0               | 7 (100)  | < 0.001 |
| Interst. Inflamm. Infilt.                  | 13 (56.5)     | 10 (43.5)     | 7 (87.5)     | 1 (12.5) | 6 (75.0)        | 2 (25.0) | 0               | 7 (100)  | < 0.001 |
| Hidropic Tubular Degen                     | 16 (69.6)     | 7 (30.4)      | 8 (100)      | 0        | 8 (100)         | 0        | 0               | 7 (100)  | < 0.001 |
| Tubular Atrophy                            | 8 (34.8)      | 15 (65.2)     | 8 (100)      | 0        | 0               | 8 (100)  | 0               | 7 (100)  | < 0.001 |
| <b>Advanced Tubulointerstitial Lesions</b> |               |               |              |          |                 |          |                 |          |         |
| Hyaline Cylinders                          | 19 (82.6)     | 4 (17.4)      | 8 (100)      | 0        | 8 (100)         | 0        | 3 (42.9)        | 4 (57.1) | 0.004   |
| Tubular Calcification                      | 23 (100)      | 0             | 8 (100)      | 0        | 8 (100)         | 0        | 7 (100)         | 0        | -       |
| Vacuolar Tubular Degen                     | 19 (82.6)     | 4 (17.4)      | 8 (100)      | 0        | 8 (100)         | 0        | 3 (42.9)        | 4 (57.1) | 0.004   |
| IFTA                                       | 16 (69.6)     | 7 (30.4)      | 8 (100)      | 0        | 8 (100)         | 0        | 0               | 7 (100)  | < 0.001 |
| Tubular Necrosis                           | 23 (100)      | 0             | 8 (100)      | 0        | 8 (100)         | 0        | 7 (100)         | 0        | -       |

Results expressed as n (%)

Pearson's chi-square test was used to compare observed and expected frequencies

*P*-value: Absence of lesion vs Presence of lesion

BS, Bowman's space; Degen., degeneration; GBM, glomerular basement membrane; IFTA, interstitial fibrosis and tubular atrophy; Inters. Inflamm. Infiltr., interstitial inflammatory filtration.

**Supplementary Table S2. Total score of mild and advanced kidney lesions of rat groups under study, at the end of protocol**

|                                    | Sham (n = 8) | CKD 1-2 (n = 8)      | CKD 3-4 (n = 7)       |
|------------------------------------|--------------|----------------------|-----------------------|
| <b>Mild Glomerular Lesions</b>     |              |                      |                       |
| Glomerular Hypertrophy             | 0            | 1.38 ± 0.18 <i>a</i> | 2.43 ± 0.20 <i>a</i>  |
| Crescent-like structures           | 1.00 ± 0.00  | 1.00 ± 0.19          | 1.86 ± 0.26 <i>ab</i> |
| Dilatation of Bowman's space       | 0            | 1.38 ± 0.18 <i>a</i> | 2.29 ± 0.18 <i>a</i>  |
| GBM Thickening                     | 0            | 0.63 ± 0.18          | 1.71 ± 0.18 <i>a</i>  |
| <b>Total</b>                       | 0.25 ± 0.00  | 1.09 ± 0.16 <i>a</i> | 2.07 ± 0.17 <i>a</i>  |
| <b>Advanced Glomerular Lesions</b> |              |                      |                       |
| Glomerular "Blebbing"              | 0            | 0.13 ± 0.13          | 0.86 ± 0.40 <i>a</i>  |
| Glomerular Atrophy                 | 0            | 0.50 ± 0.19          | 1.14 ± 0.14 <i>a</i>  |
| Glomerulosclerosis                 | 0            | 0                    | 1.14 ± 0.14 <i>ab</i> |
| <b>Total</b>                       | 0            | 0.21 ± 0.09          | 1.05 ± 0.17 <i>ab</i> |
| <b>Mild Tubular Lesions</b>        |              |                      |                       |
| Tubular dilatation                 | 0            | 0.38 ± 0.18          | 2.00 ± 0.31 <i>ab</i> |
| Inters. Inflamm. Infiltr.          | 0.13 ± 0.13  | 0.25 ± 0.16          | 1.14 ± 0.14 <i>ab</i> |
| Hidropic Tubular Degen.            | 0            | 0                    | 1.00 ± 0.00 <i>ab</i> |
| Tubular Atrophy                    | 0            | 1.25 ± 0.16 <i>a</i> | 2.29 ± 0.18 <i>a</i>  |
| <b>Total</b>                       | 0            | 0.47 ± 0.07          | 1.61 ± 0.11 <i>a</i>  |
| <b>Advanced Tubular Lesions</b>    |              |                      |                       |
| Hyaline Cylinders                  | 0            | 0                    | 0.57 ± 0.20 <i>ab</i> |
| Tubular Calcification              | 0            | 0                    | 0                     |
| Vacuolar Tubular Degen.            | 0            | 0                    | 0.57 ± 0.20 <i>ab</i> |
| IFTA                               | 0            | 0                    | 1.43 ± 0.20 <i>ab</i> |
| Tubular Necrosis                   | 0            | 0                    | 0                     |
| <b>Total</b>                       | 0            | 0                    | 0.51 ± 0.06 <i>ab</i> |

Results are presented as mean ± SEM.

The Kruskal-Wallis test was used to compare groups, followed by Bonferroni correction for multiple comparisons.
